# Supplementary material for: Thermo-responsive water purification: a thermo-switchable molecular brush for precision engineering of antibacterial ZnO on agro-waste filters
Source: Royal Society of Chemistry journal article supplement (doi:10.1039/d6ra02207c), 2026-05-21
Supplement: d6ra02207c1.pdf [file d6ra02207c1.pdf]

1

## Supporting Information

2

3

4

5

6

7

8

9

10

11

12

13

14

15

### **Thermo-Responsive Water Purification: A Thermo-Switchable Molecular Brush for Precision Engineering of Antibacterial ZnO on Agro-Waste Filters**

Chuanrui Xia,<sup>a</sup> Xue Wu,<sup>a</sup> Xin Gao,<sup>\*a</sup> Qiming Li,<sup>\*b</sup> Lincai Peng,<sup>\*a</sup> Tian Si,<sup>a</sup> Heng  
Zhang<sup>\*a</sup>

<sup>a</sup> Faculty of Chemical Engineering, Kunming University of Science and Technology,  
Kunming 650500, Yunnan, China

<sup>b</sup> Dehong Dai and Jingpo Autonomous Prefecture Institute of Sugar Industry, Mangshi  
678400, Yunnan, China

E-mail: drgaoxin@sina.com; 13988202317@163.com; zhangheng0625@sina.com

## 16 **Text S1 Effect of PNAGA on the growth of ZnO NPs Crystal Facets**

17 To further corroborate the facet-selective growth, XRD analysis was performed.  
18 The relative exposure of crystal facets in ZnO NPs is quantitatively reflected by the  
19 intensity ratio ( $r$ ) =  $I_{100}/I_{001}$ .<sup>1</sup> Values of  $r > 1$  indicate predominant growth perpendicular  
20 to the [001] direction (enhanced (100) facet exposure), characteristic of flower-like  
21 needle-like morphologies, whereas  $r < 1$  signifies preferential elongation along [001]  
22 (greater (001) facet exposure), consistent with needle-like habits.

23

## 24 **Text S2 Supplementary Experimental Methods**

### 25 2.1. Calculation of crystal size and crystallinity index

26 Crystalline phases within the samples were identified with an X'Pert-3 powder  
27 diffractometer (PANalytical, Netherlands). Crystallite sizes ( $D$ ) perpendicular to the  
28 (002) lattice plane of cellulose I and the (101) plane of ZnO NPs were calculated using  
29 Scherrer's equation (S1):<sup>2</sup>

$$30 \quad D = \frac{k\lambda}{\beta_{1/2}\cos\theta} \quad (S1)$$

31 where  $k=0.943$ ,  $\lambda=0.154056$  nm, and  $\beta_{1/2}$  represents the full width at half-maximum  
32 ( $4.21 \times 10^{-2}$  rad for cellulose (002) and  $7.80 \times 10^{-3}$  rad for ZnO (101)).

33 The crystallinity index ( $CrI$ ) of cellulose I was determined from peak  
34 deconvolution according to Eq. (S2):<sup>3</sup>

$$35 \quad CrI(\%) = \frac{I_{002} - I_{am}}{I_{002}} \times 100\% \quad (S2)$$

36 where  $I_{002}$  is the intensity of the (002) peak at  $2\theta=22.3^\circ$  and  $I_{am}$  is the minimum intensity  
37 near  $2\theta=18^\circ$ . XRD patterns were analyzed using Jade 6.0 software without background  
38 subtraction.

### 39 2.2. Computational details

40 Density functional theory (DFT) calculations were performed using the DMol<sup>3</sup>  
41 module in Materials Studio to investigate the temperature-dependent interactions

42 between PNAGA segments and ZnO surfaces. The exchange–correlation interaction  
43 was described using the Perdew–Burke–Ernzerhof functional within the generalized  
44 gradient approximation (GGA-PBE). Ultrasoft pseudopotentials were used to describe  
45 the core–electron interactions. The plane-wave cutoff energy was set to 400 eV, and  
46 geometry optimization was performed until the residual force on each atom was less  
47 than 0.03 eV Å<sup>-1</sup>.<sup>4</sup>

48 The bulk hexagonal wurtzite ZnO structure was first optimized, and the optimized  
49 lattice parameters were then used to construct ZnO surface slab models. The non-polar  
50 ZnO-(100) and polar ZnO-(001) surfaces were modeled using periodic slab models. A  
51 vacuum layer of 15 Å was introduced along the surface-normal direction to avoid  
52 artificial interactions between neighboring periodic slabs.<sup>5,6</sup> A Monkhorst-Pack k-point  
53 mesh of 2 × 2 × 1 was used for the ZnO surface calculations.<sup>6</sup> During geometry  
54 optimization, the bottom layer of the ZnO slab was fixed to maintain the bulk-like  
55 structure, whereas the upper surface atoms and PNAGA segments were fully relaxed.  
56 For the polar ZnO-(001) surface, dipole correction was applied along the surface-  
57 normal direction.

58 To represent the thermoresponsive states of PNAGA, two PNAGA segment  
59 models were constructed. The low-temperature PNAGA model was built in a hydrogen-  
60 bonded/collapsed conformation, in which part of the amide groups were involved in  
61 intra/intermolecular hydrogen bonding. The high-temperature PNAGA model was built  
62 in a hydrogen-bond-dissociated/extended conformation, exposing more amide carbonyl  
63 and N–H groups toward the ZnO surface. Before adsorption calculations, the isolated  
64 PNAGA segments and ZnO slab models were fully optimized using the same  
65 calculation parameters. The adsorption energy was calculated according to:

$$66 \quad E_{ads} = E_{\text{PNAGA/ZnO}} - E_{\text{PNAGA}} - E_{\text{ZnO}} \quad (\text{S2})$$

67 where  $E_{\text{PNAGA/ZnO}}$ ,  $E_{\text{PNAGA}}$ , and  $E_{\text{ZnO}}$  are the total energies of the PNAGA/ZnO  
68 adsorption complex, isolated PNAGA segment, and clean ZnO slab, respectively. A  
69 more negative  $E_{ads}$  value indicates a stronger PNAGA-ZnO interaction.

70 Electrostatic potential (ESP) maps were generated from the optimized electronic  
71 structures to visualize the polarity distribution of isolated PNAGA segments and the  
72 interfacial electrostatic distribution of PNAGA/ZnO complexes. The dipole moments  
73 of the isolated low-temperature and high-temperature PNAGA segments were  
74 calculated from the optimized electronic structures. All ESP maps were plotted using  
75 the same electrostatic potential scale for direct comparison.

76

### 77 S3 Characterization of NAGA monomer

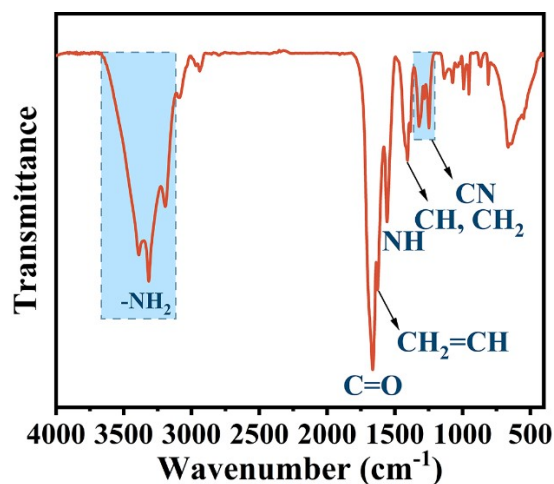

78

79 **Figure S1** FT-IR spectra of NAGA. FT-IR spectroscopy confirmed successful synthesis of N-  
80 acryloyl glycinamide, showing characteristic bands at 3390, 3317, and 3194  $\text{cm}^{-1}$  (N-H stretching  
81 with hydrogen bonding), 1662  $\text{cm}^{-1}$  (amide I, C=O stretching), 1625  $\text{cm}^{-1}$  (C=C stretching of vinyl  
82 group), 1558  $\text{cm}^{-1}$  (amide II), 1408  $\text{cm}^{-1}$  ( $\text{CH}_2$  bending), and 1258  $\text{cm}^{-1}$  (C-N stretching).

83

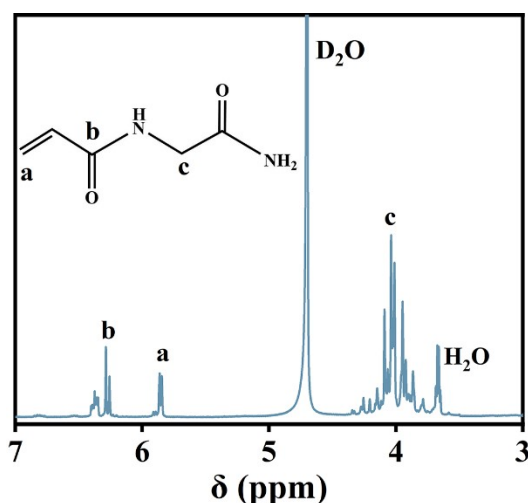

84

85 **Figure S2** **Figure S1**  $^1\text{H}$ -NMR spectra of NAGA.  $^1\text{H}$  NMR spectroscopy confirmed the  
86 successful synthesis of N-acryloyl glycinamide, displaying characteristic signals at  $\delta$  3.9 ppm (2H,  
87  $\text{NH-CH}_2\text{-CONH}$ ), 5.8 ppm (2H,  $\text{CH}=\text{CH}_2$ ), 6.2-6.3 ppm (1H,  $\text{CH}=\text{CH}_2$ ), along with a residual  
88 solvent peak at 4.7 ppm. The integrated peak areas were consistent with the expected molecular  
89 structure.

90

91

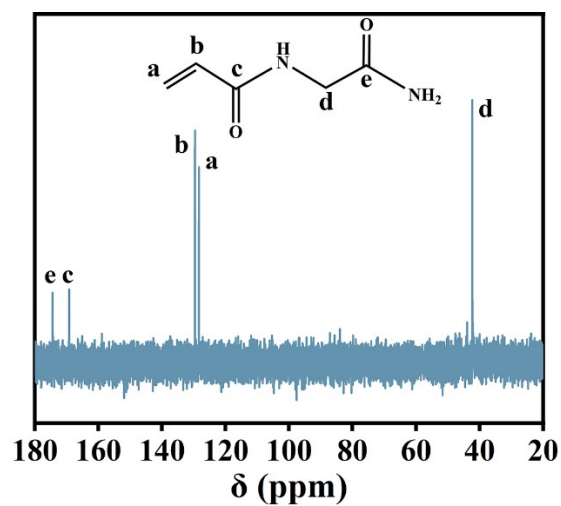

92

93 **Figure S3** <sup>13</sup>C-NMR spectra of NAGA. <sup>13</sup>C NMR spectroscopy confirmed the structure of N-  
 94 acryloyl glycinamide, with characteristic signals at δ 42.3 ppm (-NH-CH<sub>2</sub>-CO-), 128.3 and 129.6  
 95 ppm (CH=CH<sub>2</sub>), 169.2 ppm (-CO-NH- acryloyl carbonyl), and 174.4 ppm (-CONH- glycinamide  
 96 carbonyl), consistent with the expected molecular structure.

97

98

99 S4 The microstructure of the composite column

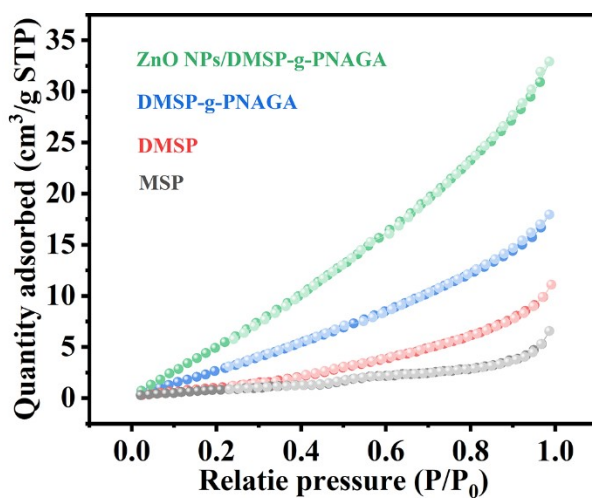

100

101

102

103

104

105

**Figure S4** Nitrogen adsorption isotherms of MSP, DMSP, DMSP-g-PNAGA and ZnO NPs/DMSP-g-PNAGA. N<sub>2</sub> adsorption-desorption isotherms revealed that both samples exhibited Type II isotherm behavior characteristic of macroporous structures, featuring reversible adsorption-desorption cycles at high relative pressures without a distinct plateau.

106 S5 XPS survey spectra of the composite column

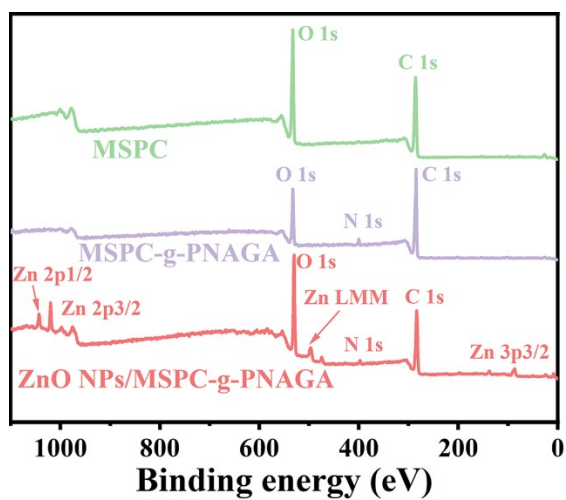

107

108 **Figure S5** XPS survey spectra of DMSP, DMSP-g-PNAGA and ZnO NPs/DMSP-g-  
109 PNAGA.

110

111 S6 Pseudo-first-order, pseudo-second-order, and intraparticle diffusion models

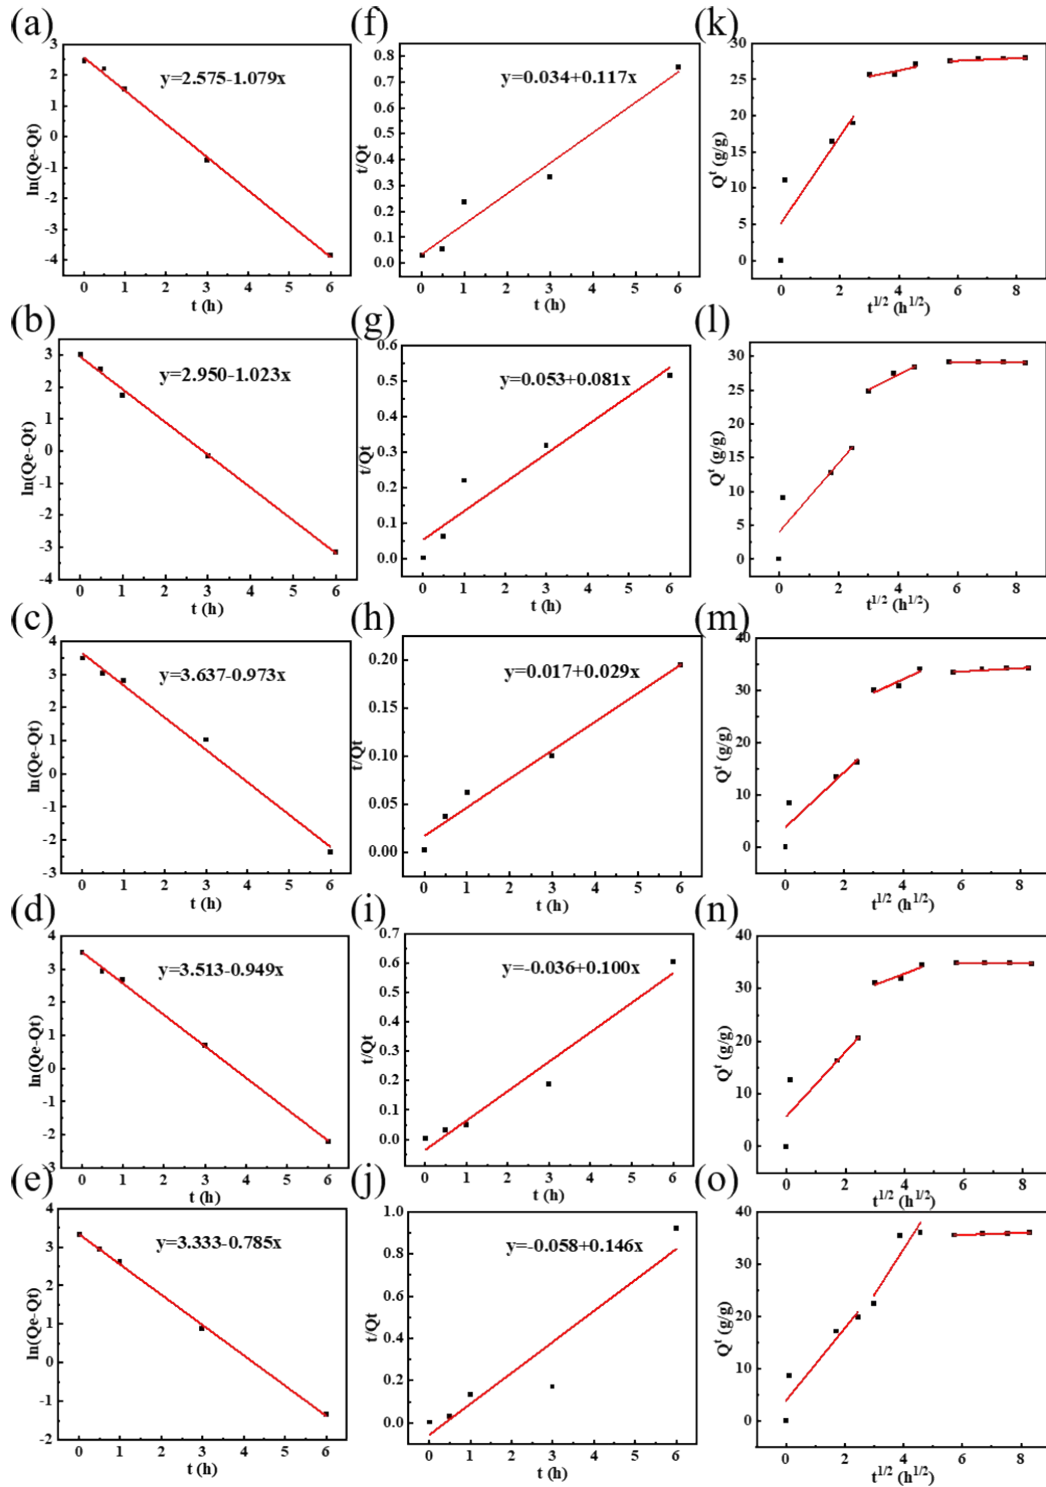

112  
113  
114  
115  
116  
117  
118

Figure S6 Fitting curves for the pseudo-first-order, pseudo-second-order, and intra-particle diffusion models of DMSP-g-PNAGA1:1

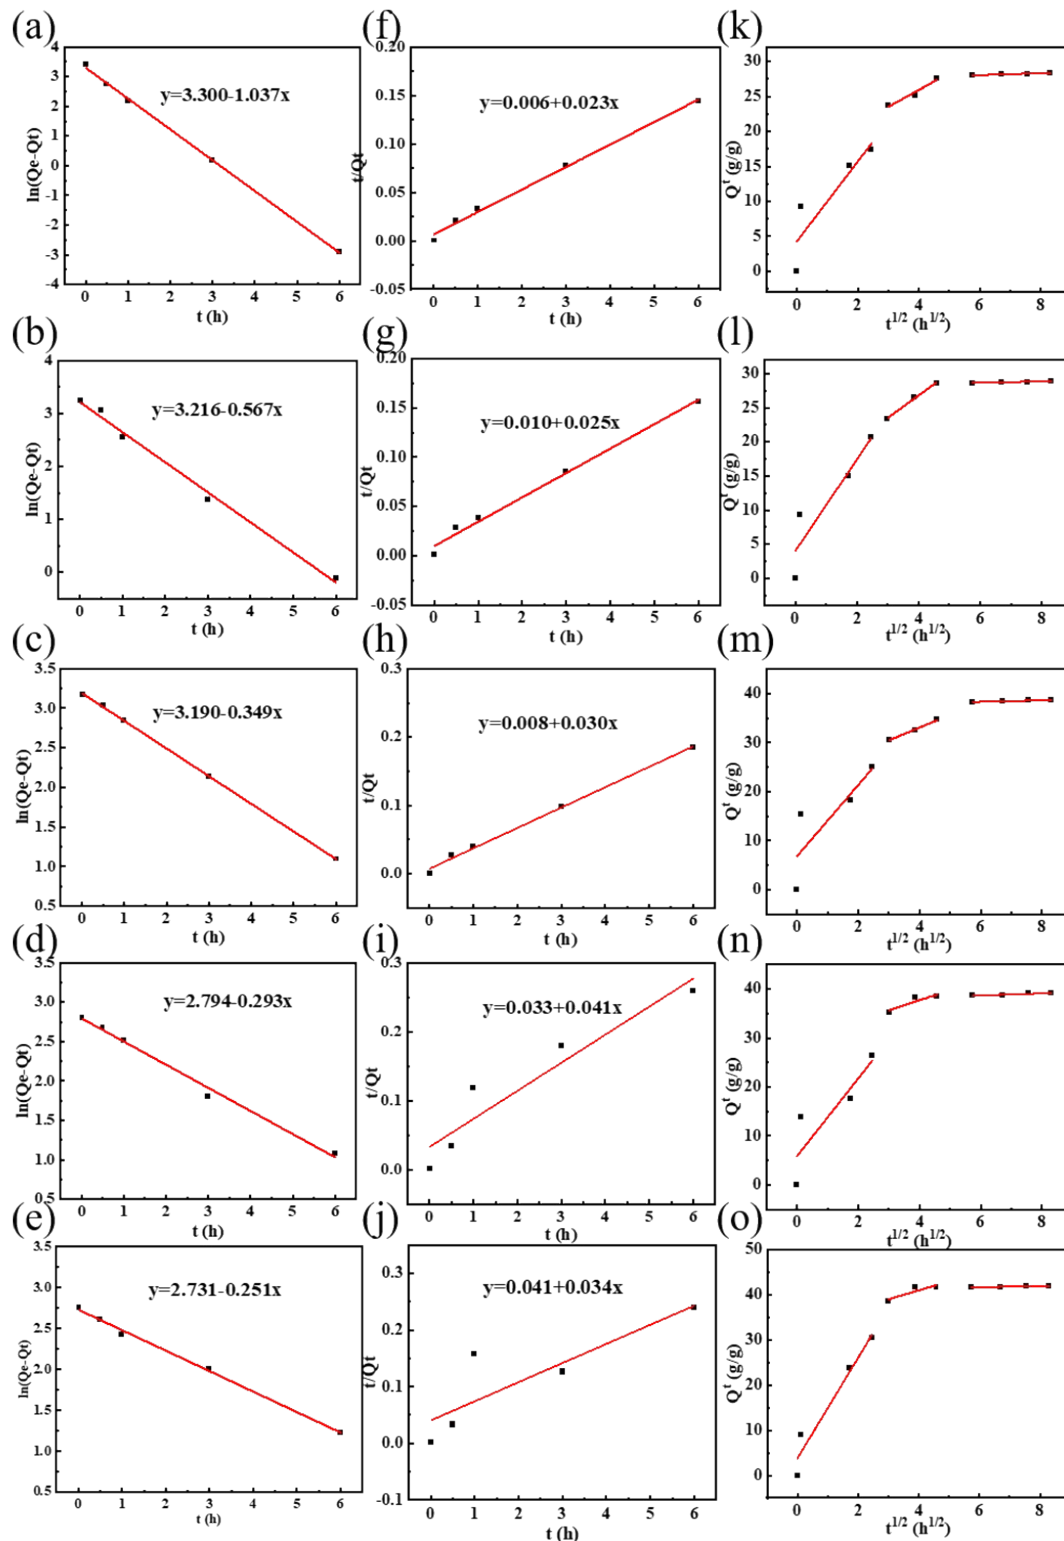

119  
 120  
 121  
 122  
 123  
 124  
 125

**Figure S7** Fitting curves for the pseudo-first-order, pseudo-second-order, and intra-particle diffusion models of DMSF-g-PNAGA100:1

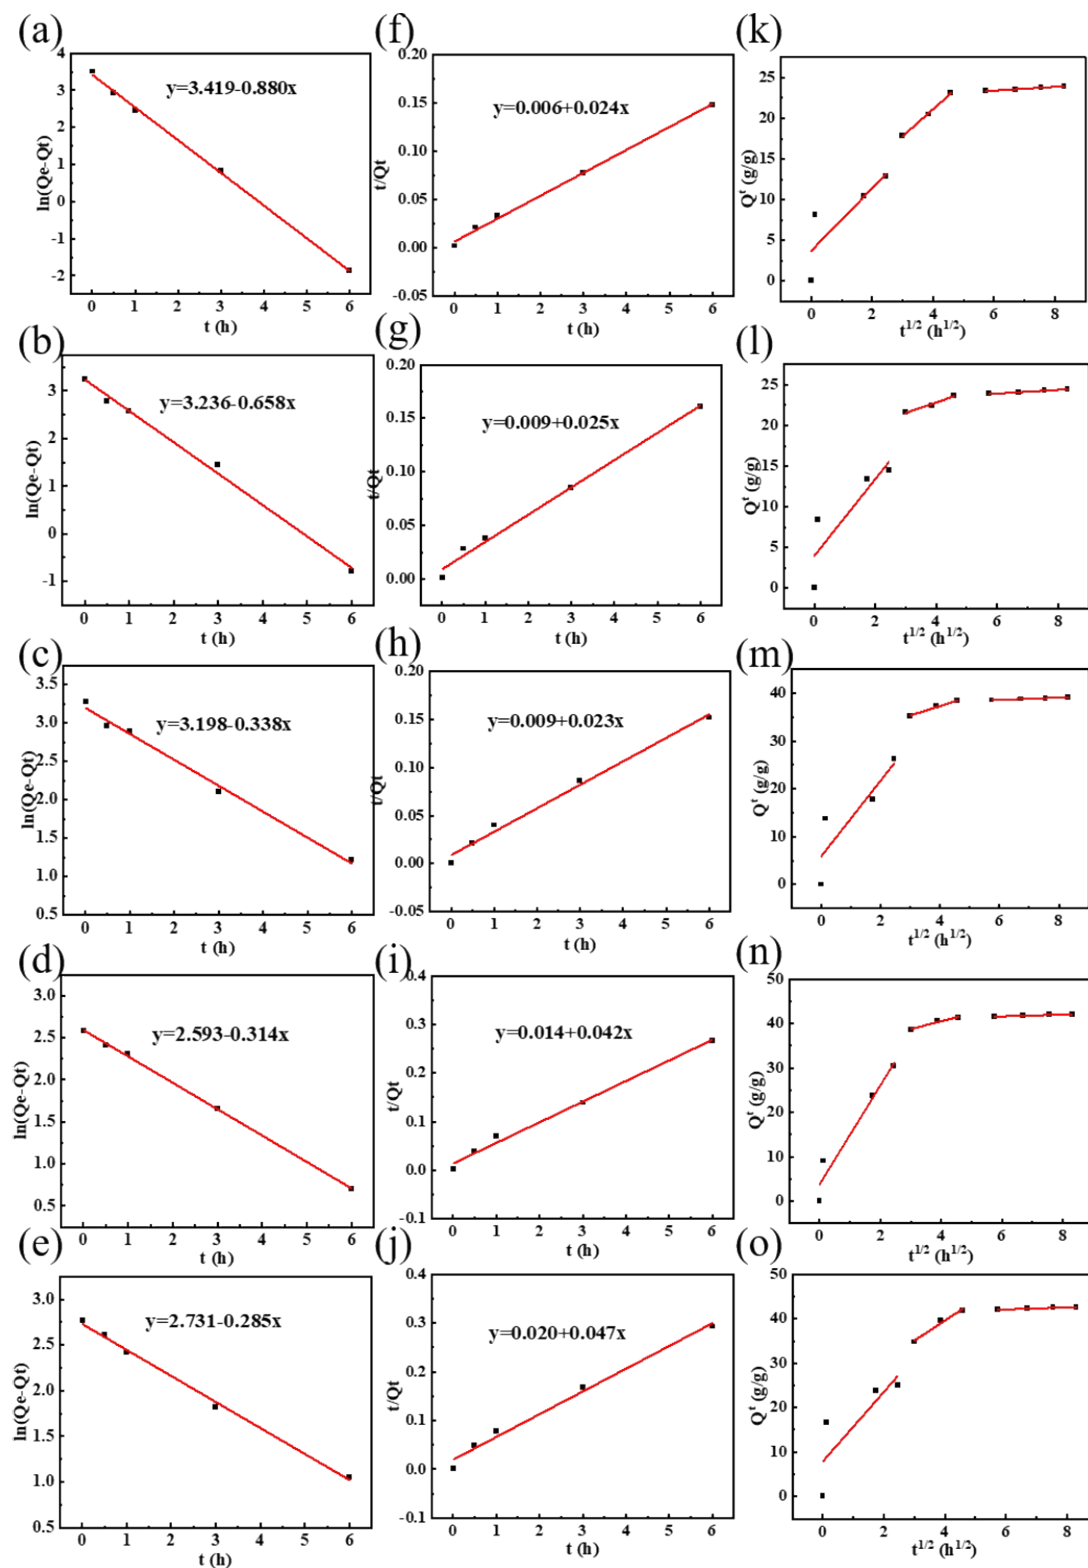

126  
 127  
 128  
 129  
 130  
 131

**Figure S8** Fitting curves for the pseudo-first-order, pseudo-second-order, and intra-particle diffusion models of DMSP-g-PNAGA-T65

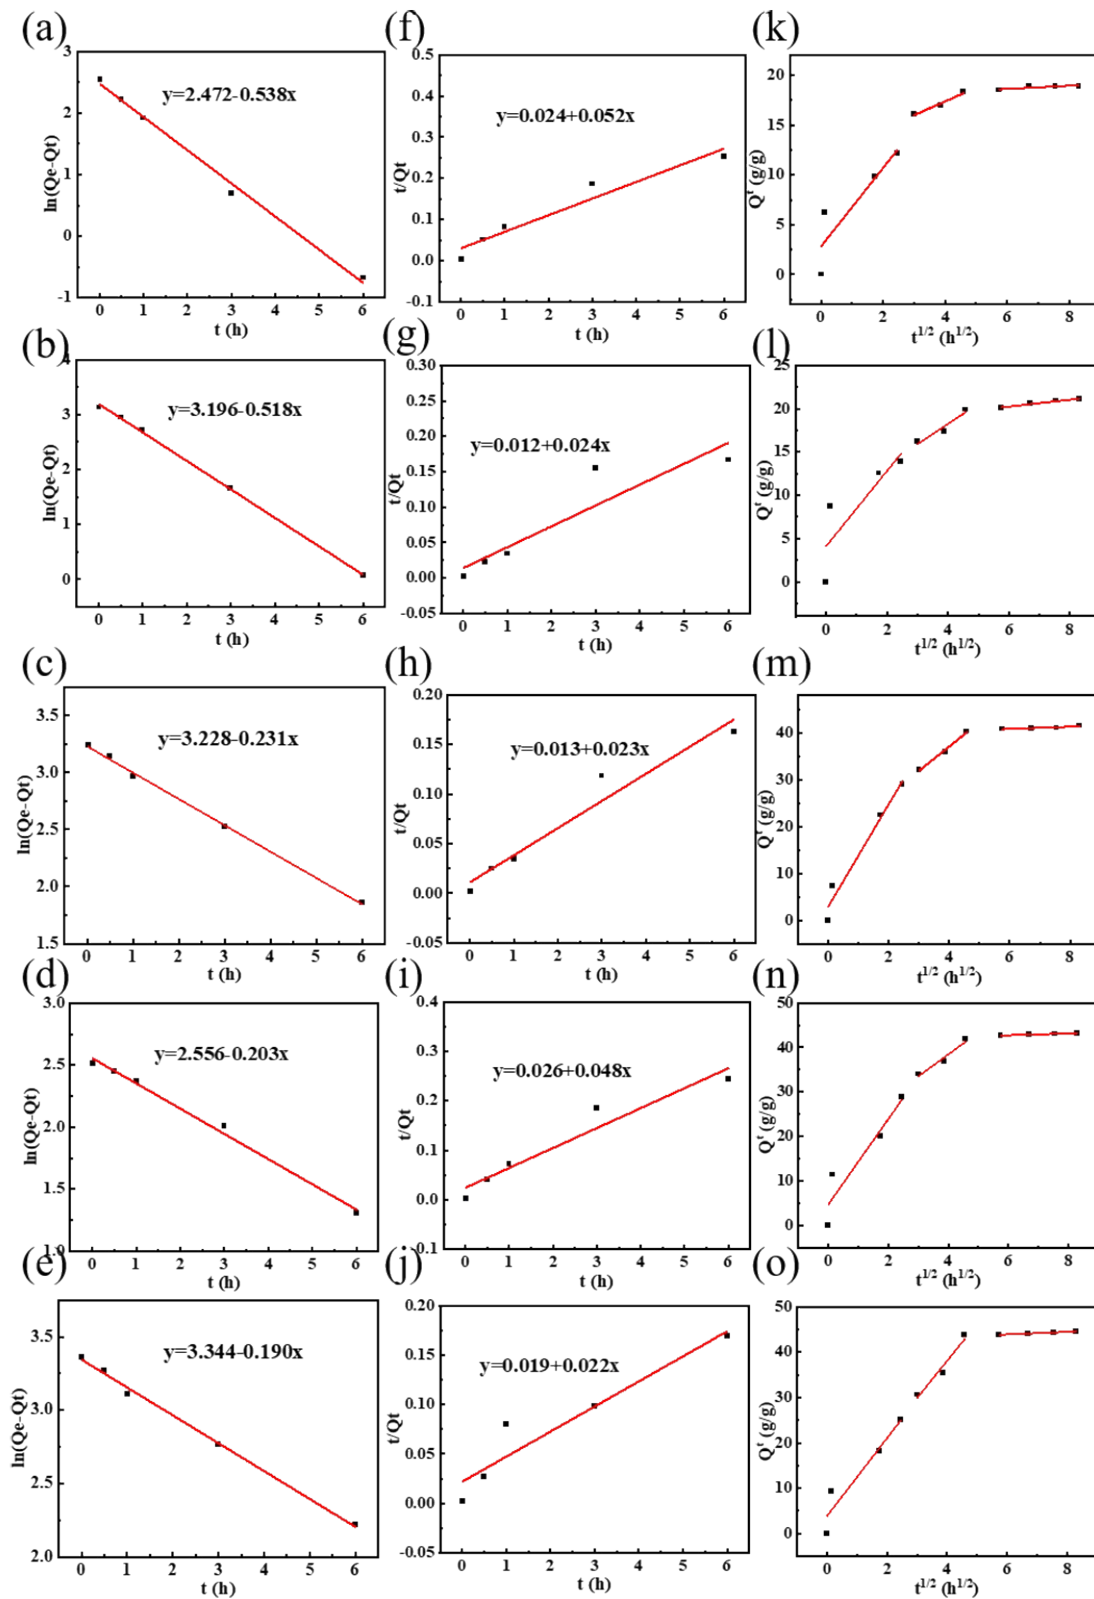

132

133

134

**Figure S9** Fitting curves for the pseudo-first-order, pseudo-second-order, and intra-particle diffusion models of DMSP-g-PNAGA-t21

135 S7 ESP maps of PNAGA/ZnO adsorption complexes

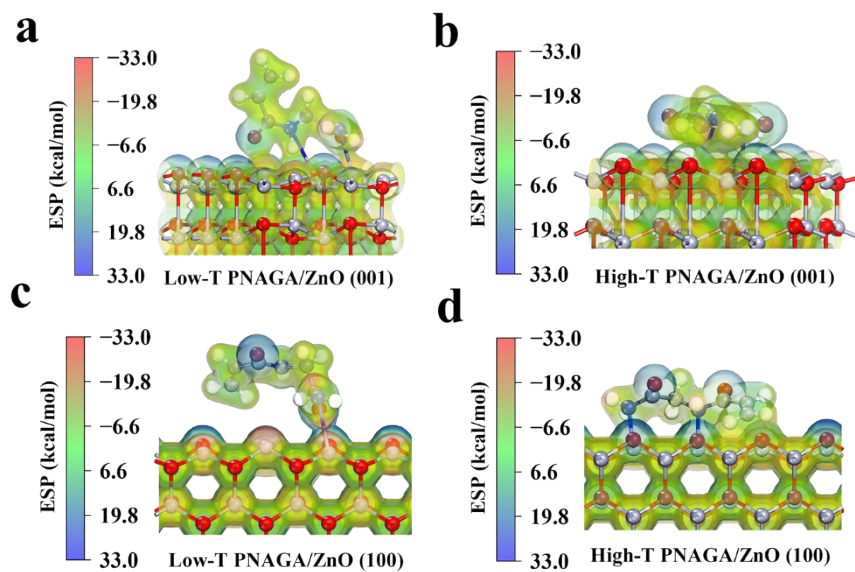

136

137 **Figure S10** ESP maps of PNAGA/ZnO adsorption complexes: (a) low-T PNAGA/(100), (b)

138 high-T PNAGA/(100), (c) low-T PNAGA/(001), and (d) high-T PNAGA/(001). The high-T

139 PNAGA/(001) complex exhibits the most pronounced interfacial electrostatic complementarity,

140 consistent with its strongest adsorption energy. All ESP maps were plotted using the same

141

electrostatic potential scale.

142

143 **S8 Semi-quantitative analysis of the relationship between ZnO loading and**  
 144 **antibacterial activity**

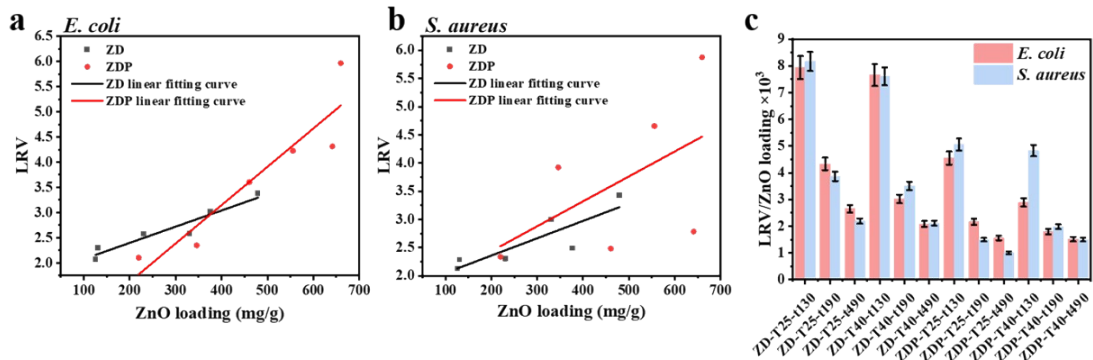

145  
 146 **Figure S11** (a, b) Scatter plots of LRV as a function of ZnO loading. (c) Apparent loading-  
 147 normalized antibacterial index (LRV/ZnO loading) for *E. coli* and *S. aureus*, respectively. The  
 148 fitting lines are presented solely to indicate trends and do not imply a strict linear correlation  
 149 between ZnO loading and antibacterial performance.

150 **S9 Correlation between Zn<sup>2+</sup> release and antibacterial activity**

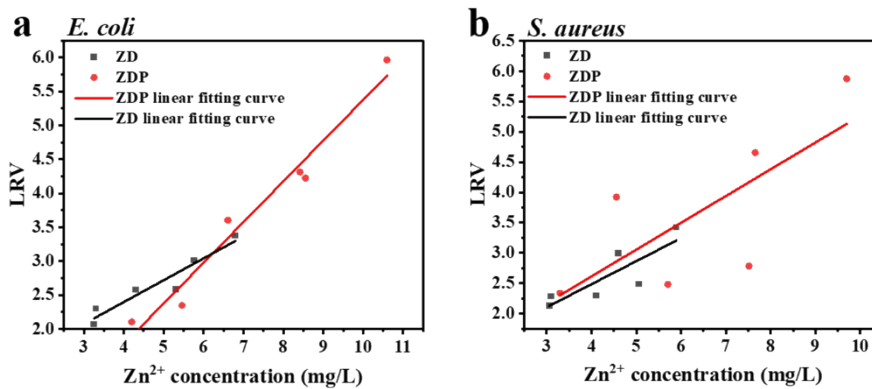

151  
 152 **Figure. S12 Correlation between Zn<sup>2+</sup> release and antibacterial activity.** Scatter plots of LRV  
 153 as a function of Zn<sup>2+</sup> concentration at 30 min for (a) *E. coli* and (b) *S. aureus*. Each point  
 154 represents one ZnO-loaded sample. Linear fitting was performed separately for the ZD and ZDP  
 155 series. For *E. coli*, strong positive correlations were observed for both ZD and ZDP, with R<sup>2</sup>  
 156 values of 0.9123 and 0.9653, respectively. For *S. aureus*, weaker correlations were observed, with  
 157 R<sup>2</sup> values of 0.5380 and 0.7151 for ZD and ZDP, respectively. The fitting was used only for semi-  
 158 quantitative trend analysis because LRV is logarithmic and Zn<sup>2+</sup> release is not the sole  
 159 antibacterial factor.

160

161 **S10 Zeta potential of DMSP-g-PNAGA following in-situ ZnO NPs growth**

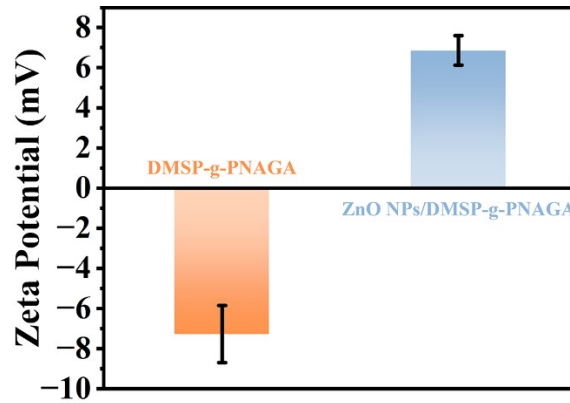

162

163 **Figure S13** Zeta potentials of DMSP-g-PNAGA and ZnO NPs/DMSP-g-PNAGA. The zeta  
 164 potential exhibited a substantial shift following the growth of ZnO NPs.

165

166 **S11 Results of BET analysis for the isotherms used in the study**

167 **Table S1** Specific surface area and average pore size MSP, DMSP, DMSP-g-PNAGA and ZnO  
 168 NPs/DMSP-g-PNAGA.

| Sample               | Pore size<br>(nm) | Pore volume<br>(cm <sup>3</sup> /g) | Surface area<br>(m <sup>2</sup> /g) |
|----------------------|-------------------|-------------------------------------|-------------------------------------|
| MSP                  | 12.6 ± 0.04       | 0.030                               | 3.73 ± 1.51                         |
| DMSP                 | 13.3 ± 0.27       | 0.021                               | 4.11 ± 1.51                         |
| DMSP-g-PNAGA         | 11.6 ± 0.06       | 0.012                               | 5.26 ± 0.47                         |
| ZnO NPs/DMSP-g-PNAGA | 14.1 ± 0.31       | 0.014                               | 5.48 ± 0.33                         |

169

170 **S12 Pseudo-first-order, pseudo-second-order, and intraparticle diffusion models**

171 **fitting parameters**

172 **Table S2** Kinetic parameters for Water adsorption by DMSP-g-PNAGA1:1: linear pseudo-first-  
 173 order and pseudo-second-order model

| Model parameter                       | Linear fitting |         |         |         |         |
|---------------------------------------|----------------|---------|---------|---------|---------|
|                                       | 20 °C          | 25 °C   | 30 °C   | 35 °C   | 40 °C   |
| $q_e$ (g/g)                           | 28.1215        | 29.9491 | 35.0508 | 35.6125 | 37.1471 |
| $q_t$ (g/g)                           | 27.9259        | 29.0734 | 34.3336 | 34.9146 | 35.0617 |
| <b>PFO</b> $k_1$ (min <sup>-1</sup> ) | 1.0786         | 1.0227  | 0.9735  | 0.9494  | 0.7855  |
| $R^2$                                 | 0.9980         | 0.9980  | 0.9927  | 0.9989  | 0.9990  |
| RSS                                   | 0.0002         | 0.0004  | 0.0007  | 0.0002  | 0.0017  |
| $q_e$ (g/g)                           | 29.0651        | 28.5593 | 25.1587 | 30.8897 | 24.0697 |
| $q_t$ (g/g)                           | 27.9259        | 29.0734 | 34.3336 | 34.9146 | 35.0617 |
| <b>PSO</b> $k_2$ (min <sup>-1</sup> ) | 0.1176         | 0.0808  | 0.0297  | 0.1002  | 0.1467  |
| $R^2$                                 | 0.9664         | 0.9290  | 0.9754  | 0.9635  | 0.8962  |
| RSS                                   | 0.0116         | 0.0120  | 0.0312  | 0.0451  | 0.1113  |

174

175

176 **Table S3** Kinetic parameters for Water adsorption by DMSP-g-PNAGA1:1: intraparticle  
 177 diffusion models

| Parameter   | Linear fitting |         |         |         |         |
|-------------|----------------|---------|---------|---------|---------|
|             | 20 °C          | 25 °C   | 30 °C   | 35 °C   | 40 °C   |
| $q_e$ (g/g) | 24.7612        | 24.7652 | 38.4325 | 42.0121 | 43.8563 |
| $q_t$ (g/g) | 27.9259        | 29.0734 | 34.3336 | 34.9146 | 35.0617 |
| $k_{i1}$    | 5.9947         | 5.0776  | 5.2493  | 6.1317  | 6.9258  |
| $k_{i2}$    | 0.8453         | 2.2064  | 2.5384  | 2.1203  | 8.7645  |
| $k_{i3}$    | 0.1717         | 0.0376  | 0.3255  | 0.0223  | 0.2110  |
| $R_{i1}^2$  | 0.7407         | 0.7605  | 0.7963  | 0.7006  | 0.8683  |
| $R_{i2}^2$  | 0.6877         | 0.9519  | 0.8537  | 0.8918  | 0.8327  |
| $R_{i3}^2$  | 0.8747         | 0.4702  | 0.7342  | 0.9681  | 0.9401  |

178

179

**Table S4** Kinetic parameters for Water adsorption by DMSP-g-PNAGA100:1: linear

180

pseudo-first-order and pseudo-second-order model

| Model parameter                       | Linear fitting |         |         |         |         |
|---------------------------------------|----------------|---------|---------|---------|---------|
|                                       | 20 °C          | 25 °C   | 30 °C   | 35 °C   | 40 °C   |
| $q_e$ (g/g)                           | 28.7612        | 28.7652 | 38.4325 | 39.0121 | 41.8563 |
| $q_t$ (g/g)                           | 28.4085        | 28.9051 | 38.6731 | 39.0982 | 41.8982 |
| <b>PFO</b> $k_1$ (min <sup>-1</sup> ) | 1.0372         | 0.5673  | 0.3492  | 0.2931  | 0.2506  |
| $R^2$                                 | 0.9990         | 0.9928  | 0.9998  | 0.9925  | 0.9969  |
| RSS                                   | 0.0021         | 0.0101  | 0.0001  | 0.0114  | 0.0146  |
| $q_e$ (g/g)                           | 27.7561        | 29.6151 | 38.3121 | 39.6451 | 30.1231 |
| $q_t$ (g/g)                           | 28.4085        | 28.9051 | 38.6731 | 39.0982 | 41.8982 |
| <b>PSO</b> $k_2$ (min <sup>-1</sup> ) | 0.0233         | 0.0248  | 0.0298  | 0.0407  | 0.0337  |
| $R^2$                                 | 0.9948         | 0.9911  | 0.9962  | 0.9014  | 0.7466  |
| RSS                                   | 0.0109         | 0.0134  | 0.0098  | 0.0437  | 0.0938  |

181

182

**Table S5** Kinetic parameters for Water adsorption by DMSP-g-PNAGA100:1: intraparticle

183

diffusion models

| Parameter   | Linear fitting |         |         |         |         |
|-------------|----------------|---------|---------|---------|---------|
|             | 20 °C          | 25 °C   | 30 °C   | 35 °C   | 40 °C   |
| $q_e$ (g/g) | 28.7612        | 28.7652 | 38.4325 | 39.0121 | 41.8563 |
| $q_t$ (g/g) | 28.4085        | 28.9051 | 38.6731 | 39.0982 | 41.8982 |
| $k_{i1}$    | 5.7246         | 6.6913  | 7.2782  | 7.9234  | 11.1364 |
| $k_{i2}$    | 2.4154         | 3.2817  | 2.6042  | 2.0528  | 1.9981  |
| $k_{i3}$    | 0.1409         | 0.0914  | 0.1511  | 0.2031  | 0.0625  |
| $R_{i1}^2$  | 0.7906         | 0.8414  | 0.6871  | 0.7604  | 0.9479  |
| $R_{i2}^2$  | 0.9439         | 0.9964  | 0.9827  | 0.8288  | 0.8204  |
| $R_{i3}^2$  | 0.9801         | 0.9698  | 0.9302  | 0.9468  | 0.9776  |

184

185

186

187  
188

**Table S6** Kinetic parameters for Water adsorption by DMSP-g-PNAGA-T65: linear pseudo-first-order and pseudo-second-order model

| Model parameter                       | Linear fitting |         |         |         |         |
|---------------------------------------|----------------|---------|---------|---------|---------|
|                                       | 20 °C          | 25 °C   | 30 °C   | 35 °C   | 40 °C   |
| $q_e$ (g/g)                           | 24.7612        | 24.7652 | 38.4325 | 42.0121 | 43.8563 |
| $q_t$ (g/g)                           | 23.9464        | 24.4610 | 39.1627 | 42.0631 | 42.6428 |
| <b>PFO</b> $k_1$ (min <sup>-1</sup> ) | 0.8803         | 0.6583  | 0.3380  | 0.3141  | 0.2849  |
| $R^2$                                 | 0.9989         | 0.9946  | 0.9926  | 0.9993  | 0.9958  |
| RSS                                   | 0.0015         | 0.0164  | 0.0066  | 0.0016  | 0.0082  |
| $q_e$ (g/g)                           | 27.7561        | 29.6151 | 38.3121 | 39.6451 | 30.1231 |
| $q_t$ (g/g)                           | 23.9464        | 24.4610 | 39.1627 | 42.0631 | 42.6428 |
| <b>PSO</b> $k_2$ (min <sup>-1</sup> ) | 0.0237         | 0.0254  | 0.0243  | 0.0424  | 0.0466  |
| $R^2$                                 | 0.9970         | 0.9922  | 0.9900  | 0.9923  | 0.9885  |
| RSS                                   | 0.0034         | 0.0107  | 0.0141  | 0.0183  | 0.0439  |

189  
190  
191

**Table S7** Kinetic parameters for Water adsorption by DMSP-g-PNAGA-T65: intraparticle diffusion models

| Parameter   | Linear fitting |         |         |         |         |
|-------------|----------------|---------|---------|---------|---------|
|             | 20 °C          | 25 °C   | 30 °C   | 35 °C   | 40 °C   |
| $q_e$ (g/g) | 24.5681        | 24.6452 | 38.9984 | 42.1561 | 43.2481 |
| $q_t$ (g/g) | 23.9464        | 24.4610 | 39.1627 | 42.0631 | 42.6428 |
| $k_{i1}$    | 3.8300         | 4.7167  | 7.9235  | 11.1364 | 7.8191  |
| $k_{i2}$    | 3.3237         | 1.2822  | 1.9749  | 1.7534  | 4.4941  |
| $k_{i3}$    | 0.2330         | 0.2338  | 0.2341  | 0.2001  | 0.2338  |
| $R_{i1}^2$  | 0.6889         | 0.8651  | 0.8720  | 0.9479  | 0.6724  |
| $R_{i2}^2$  | 0.9959         | 0.9893  | 0.9867  | 0.9636  | 0.9765  |
| $R_{i3}^2$  | 0.9971         | 0.9985  | 0.9971  | 0.9903  | 0.9971  |

192  
193  
194  
195

196  
197

**Table S8** Kinetic parameters for Water adsorption by DMSP-g-PNAGA-t21: linear pseudo-first-order and pseudo-second-order model

| Model parameter                       | Linear fitting |         |         |         |         |
|---------------------------------------|----------------|---------|---------|---------|---------|
|                                       | 20 °C          | 25 °C   | 30 °C   | 35 °C   | 40 °C   |
| $q_e$ (g/g)                           | 18.9311        | 21.1142 | 41.5184 | 43.1857 | 44.6024 |
| $q_t$ (g/g)                           | 18.9482        | 21.0661 | 41.5338 | 43.1578 | 44.5714 |
| <b>PFO</b> $k_1$ (min <sup>-1</sup> ) | 0.5383         | 0.5184  | 0.2306  | 0.2033  | 0.1901  |
| $R^2$                                 | 0.9992         | 0.9977  | 0.9985  | 0.9982  | 0.9950  |
| RSS                                   | 0.0008         | 0.0022  | 0.0003  | 0.0003  | 0.0009  |
| $q_e$ (g/g)                           | 20.4241        | 23.1422 | 36.4251 | 41.6242 | 40.1424 |
| $q_t$ (g/g)                           | 18.9482        | 21.0661 | 41.5338 | 43.1578 | 44.5714 |
| <b>PSO</b> $k_2$ (min <sup>-1</sup> ) | 0.0521         | 0.0244  | 0.0239  | 0.0479  | 0.0218  |
| $R^2$                                 | 0.9384         | 0.9365  | 0.8911  | 0.9574  | 0.8822  |
| RSS                                   | 0.8992         | 0.6056  | 1.8330  | 0.9560  | 2.6112  |

198  
199  
200

**Table S9** Kinetic parameters for Water adsorption by DMSP-g-PNAGA-t21: intraparticle diffusion models

| Parameter   | Linear fitting |         |         |         |         |
|-------------|----------------|---------|---------|---------|---------|
|             | 20 °C          | 25 °C   | 30 °C   | 35 °C   | 40 °C   |
| $q_e$ (g/g) | 24.7612        | 24.7652 | 38.4325 | 42.0121 | 43.8563 |
| $q_t$ (g/g) | 18.9482        | 23.0661 | 41.5338 | 43.1578 | 44.5714 |
| $k_{i1}$    | 3.9394         | 4.3563  | 10.9057 | 9.5850  | 8.5803  |
| $k_{i2}$    | 1.3882         | 2.3227  | 5.1892  | 4.9029  | 8.1826  |
| $k_{i3}$    | 0.1644         | 0.3998  | 0.2449  | 0.1954  | 0.2809  |
| $R_{i1}^2$  | 0.8028         | 0.7039  | 0.9654  | 0.8811  | 0.9039  |
| $R_{i2}^2$  | 0.9796         | 0.9406  | 0.9913  | 0.9521  | 0.9559  |
| $R_{i3}^2$  | 0.7677         | 0.9426  | 0.8267  | 0.9499  | 0.9974  |

201

202 **S13 Linear fitting was performed using ZnO loading as the independent variable**  
 203 **and LRV as the dependent variable**

204 **Table S10** Linear fitting parameters for the relationship between ZnO loading and LRV.

| <b>Bacterial strain</b> | <b>Series</b> | <b>Fitting equation</b> | <b>Slope</b> | <b>Intercept</b> | <b>R<sup>2</sup></b> |
|-------------------------|---------------|-------------------------|--------------|------------------|----------------------|
| <i>E. coli</i>          | ZD            | y=ax+b                  | 0.0032       | 1.7555           | 0.9159               |
| <i>E. coli</i>          | ZDP           | y=ax+b                  | 0.0076       | 0.1004           | 0.8593               |
| <i>S. aureus</i>        | ZD            | y=ax+b                  | 0.0031       | 1.7447           | 0.7522               |
| <i>S. aureus</i>        | ZDP           | y=ax+b                  | 0.0044       | 1.5541           | 0.2973               |

205

206

207 **S14 Linear fitting parameters for the relationship between Zn<sup>2+</sup> release and LRV**

208 **Table S11** Linear fitting parameters for the relationship between Zn<sup>2+</sup> release and LRV

| <b>Bacterial strain</b> | <b>Series</b> | <b>Fitting equation</b> | <b>Slope</b> | <b>Intercept</b> | <b>R<sup>2</sup></b> |
|-------------------------|---------------|-------------------------|--------------|------------------|----------------------|
| <i>E. coli</i>          | ZD            | y=ax+b                  | 0.3215       | 1.1126           | 0.9123               |
| <i>E. coli</i>          | ZDP           | y=ax+b                  | 0.5999       | -0.6228          | 0.9653               |
| <i>S. aureus</i>        | ZD            | y=ax+b                  | 0.3803       | 0.9645           | 0.7151               |
| <i>S. aureus</i>        | ZDP           | y=ax+b                  | 0.4418       | 0.8476           | 0.5380               |

209

210

211 **S15 Variation in r values for multiple DMSP and DMSP-g-PNAGA samples**

212 **Table S12** r values of DMSP and DMSP-g-PNAGA samples at reaction temperatures of 25 °C  
213 and 40 °C and times of 130, 190, and 490 min

---

| Sample       | r   |
|--------------|-----|
| ZD-T25-t130  | 1.2 |
| ZD-T25-t190  | 1.1 |
| ZD-T25-t490  | 1.3 |
| ZD-T40-t130  | 1.1 |
| ZD-T40-t190  | 1.2 |
| ZD-T40-t490  | 1.2 |
| ZDP-T25-t130 | 0.8 |
| ZDP-T25-t190 | 0.9 |
| ZDP-T25-t490 | 0.9 |
| ZDP-T40-t130 | 1.1 |
| ZDP-T40-t190 | 1.3 |
| ZDP-T40-t490 | 1.4 |

---

214

215

## 216 **Supplementary References**

- 217 1T. Tian, S. Tu, A. Xu, S. Yin, A. L. Oechsle, T. Xiao, A. Vagias, J.  
218 Eichhorn, J. Suo, Z. Yang, S. Bernstorff and P. Müller-Buschbaum, *Adv. Funct.*  
219 *Mater.*, DOI:10.1002/adfm.202311793.
- 220 2X. Wu, Y. Liu, M. Li, B. Li, X. Mao, Q. Wang, X. Tang, H. Zhang, L.  
221 Peng and X. Gao, *Chem. Eng. J*, DOI:10.1016/j.cej.2024.153757.
- 222 3G. E. Dawwam, M. T. Al-Shemy and A. S. El-Demerdash, *Sci. Rep.*,  
223 2022, **12**, 1–18.
- 224 4G. Sun, Y. Chen, X. Xia, Y. Wang, J. Zeng, J. Zhu, L. Gao, L. Peng, L.  
225 Wang, X. Kong and Y. Jin, DOI:10.1021/jacs.5c15840.
- 226 5S. Wang, Z. Zhao, L. Jia, X. Guo, R. Yang, Q. Deng and R. Sun,  
227 DOI:10.1021/acssensors.4c01374.
- 228 6Y. Zhang, C. Wang, F. Gong, P. Wang, U. Guharoy, C. Yang, H. Zhang,  
229 S. Fang and J. Liu, *J. Hazard. Mater.*, 2020, **388**, 122069.
- 230  
231
